# Supplementary material for: SARS-CoV-2 Genetic diversity and lineage dynamics of in Egypt
Source: bioRxiv or medRxiv preprint supplement (doi:10.1101/2022.01.05.22268646), 2022-01-05

A)

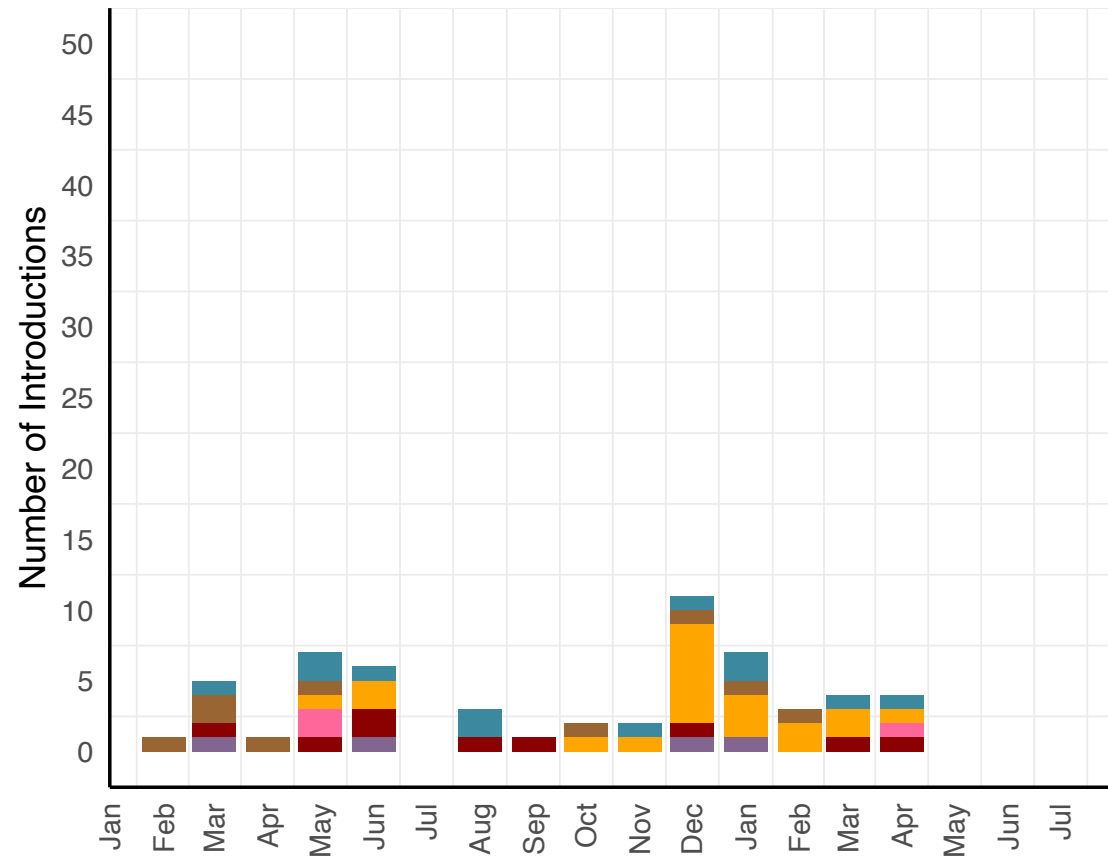

2020

2021

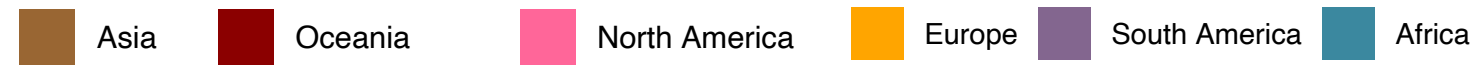

B)

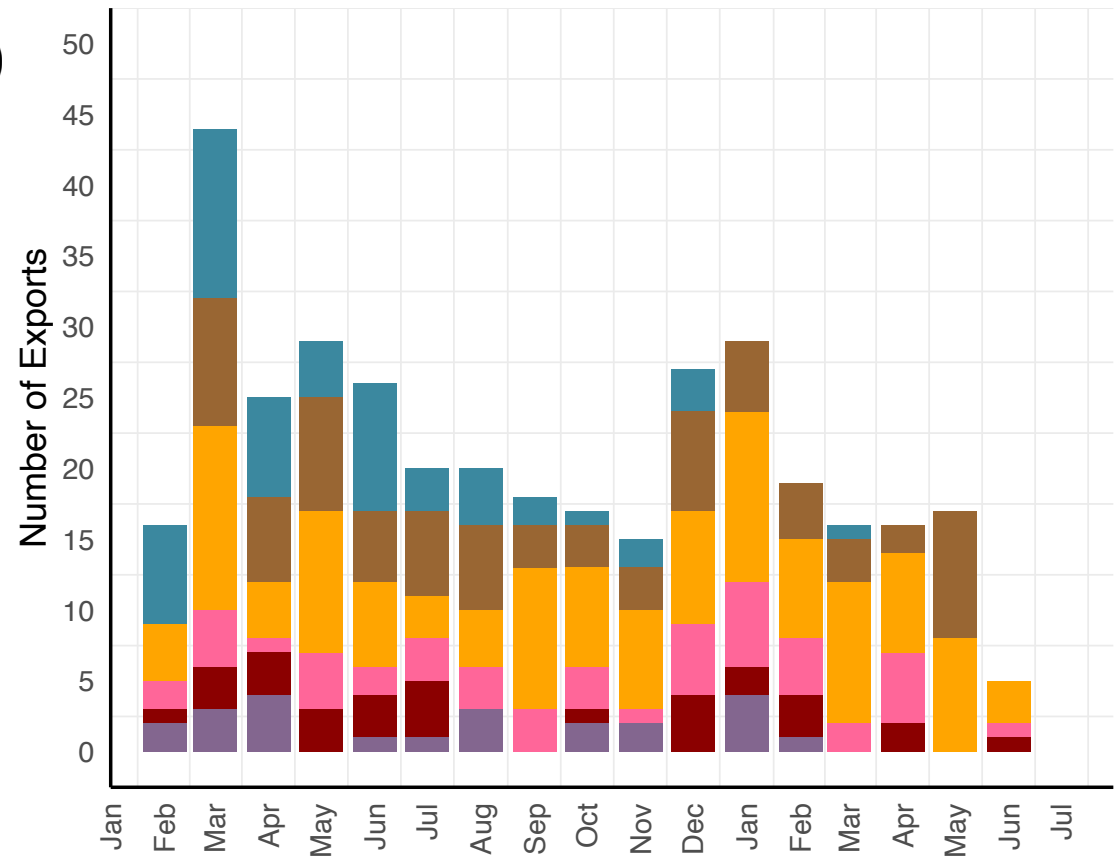

2020

2021



Supplement: Supplementary file [file media-4.pdf]
